# Supplementary material for: “Carrier–drug” layer-by-layer hybrid assembly of biocompatible polydopamine nanoparticles to amplify photo-chemotherapy
Source: Royal Society of Chemistry journal article supplement (doi:10.1039/d2nr03200g), 2022-01-01
Supplement: d2nr03200g1.pdf [file d2nr03200g1.pdf]

## Supporting information

### **“Carrier-drug” layer-by-layer hybrid assembly of biocompatible polydopamine nanoparticles to amplify photo-chemotherapy**

Lingyu Lv<sup>a</sup>, Hao Cheng<sup>a</sup>, Zhen Wang<sup>a</sup>, Zhangyi Miao<sup>a</sup>, Feng Zhang<sup>a</sup>, Jie Chen<sup>a</sup>, Gang Wang<sup>a</sup>, Ling Tao<sup>b</sup>, Jianping Zhou<sup>a</sup>, Huaqing Zhang<sup>a, \*</sup>, Yang Ding<sup>a, b, \*</sup>

*<sup>a</sup>State Key Laboratory of Natural Medicines, Department of Pharmaceutics, China Pharmaceutical University, Nanjing, 210009, China*

*<sup>b</sup>The High Efficacy Application of Natural Medicinal Resources Engineering Center of Guizhou Province, School of Pharmaceutical Sciences, Guizhou Medical University, Guiyang 550025, China*

\* Corresponding authors.

E-mail: Yang Ding, dydszyzf@163.com; Huaqing Zhang, zhanghq0527@163.com.

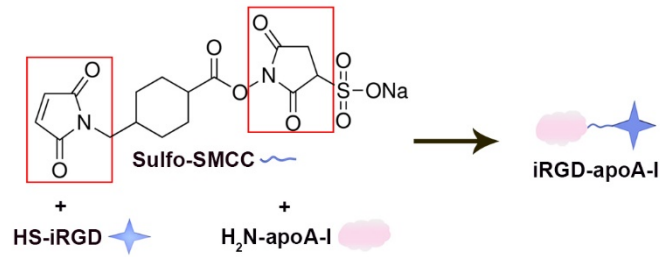

**Fig. S1** Synthetic scheme for iRGD-apoA-I.

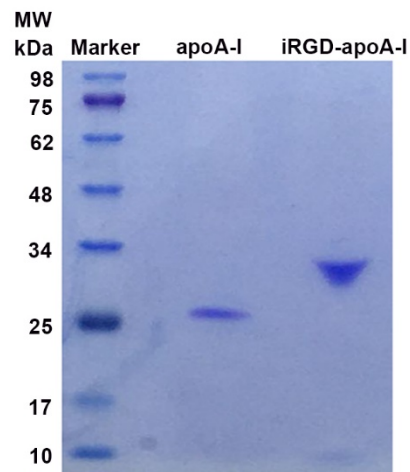

**Fig. S2** SDS-PAGE analysis of apoA-I, iRGD-apoA-I, and marker, respectively.

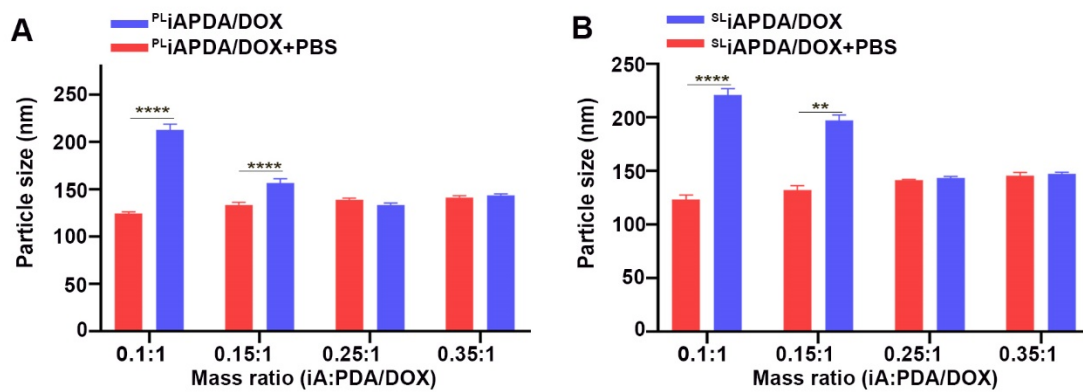

**Fig. S3** The size distribution measured by dynamic light scattering of <sup>PLi</sup>iAPDA/DOX (A) and <sup>SLi</sup>iAPDA/DOX (B) prepared with different iRGD-apoA-I (iA): PDA/DOX mass ratio and incubation with PBS for 24 h. Data were presented as mean  $\pm$  SD,  $n = 3$ . \*\* $P < 0.01$ , \*\*\*\* $P < 0.0001$ .

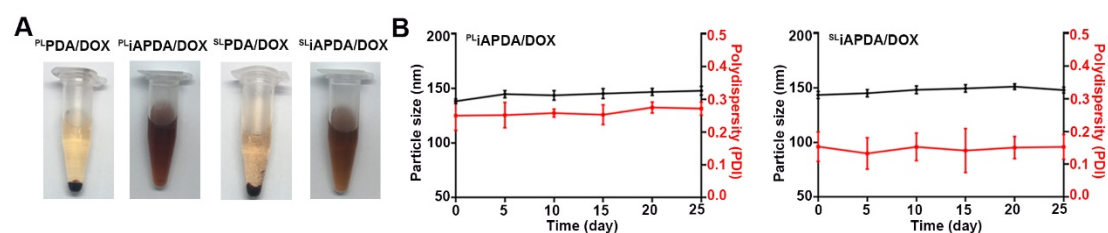

**Fig. S4** (A) The stabilization of  $^{PL}PDA/DOX$ ,  $^{SL}PDA/DOX$ ,  $^{PLi}APDA/DOX$ , and  $^{SLi}APDA/DOX$  suspended in PBS after incubation for 24 h. (B) The change in the particle sizes and polydispersity index of  $^{PLi}APDA/DOX$  and  $^{SLi}APDA/DOX$  during incubation in PBS (pH = 7.4) at 4 °C for 25 days, respectively. Data were presented as mean  $\pm$  SD,  $n = 3$ .

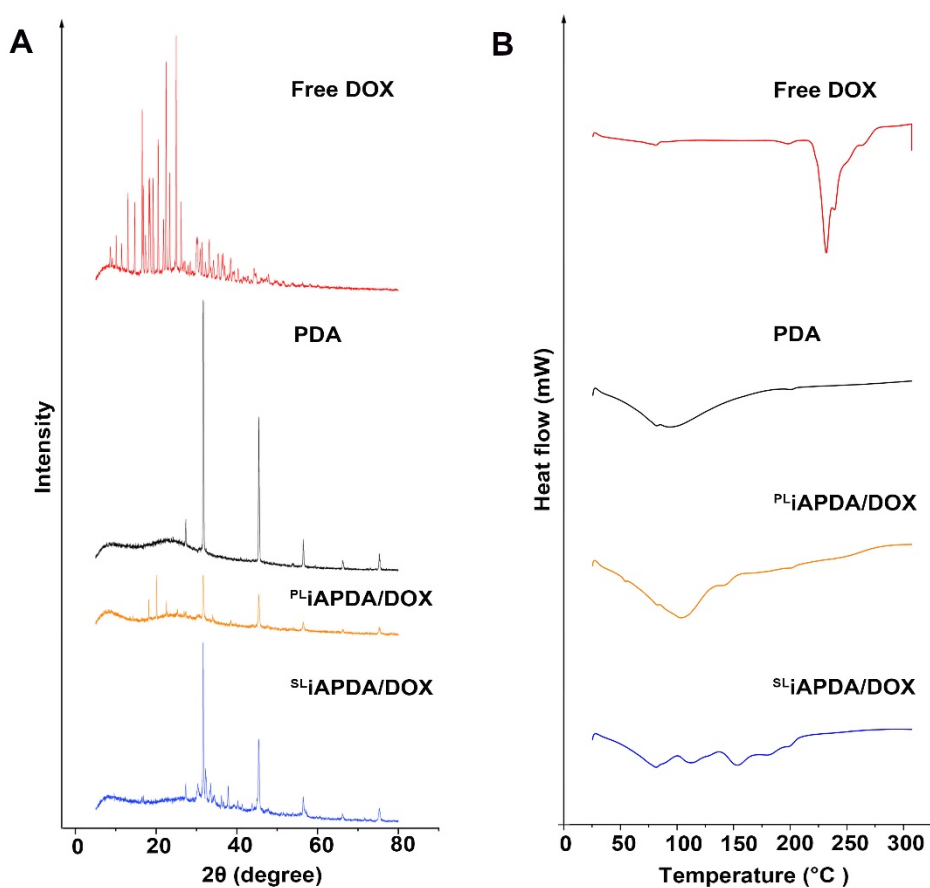

**Fig. S5** XRD analysis (A) and DSC thermograms (B) of free DOX, PDA,  $^{PLi}APDA/DOX$ , and  $^{SLi}APDA/DOX$ .

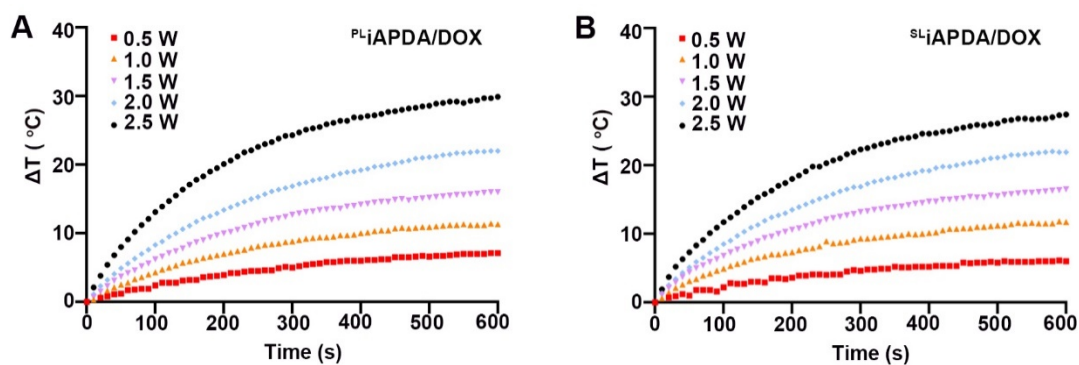

**Fig. S6** The photothermal capability of <sup>PLi</sup>iAPDA/DOX (A) and <sup>SLi</sup>iAPDA/DOX (B) at various NIR laser power (200 µg/mL of PDA), respectively.

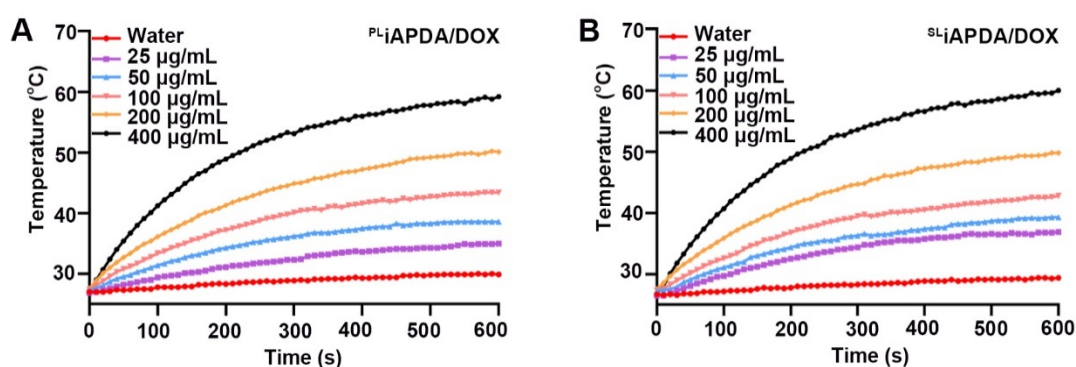

**Fig. S7** The photothermal capability of <sup>PLi</sup>iAPDA/DOX (A) and <sup>SLi</sup>iAPDA/DOX (B) at different PDA concentrations (2 W/cm<sup>2</sup>), respectively.

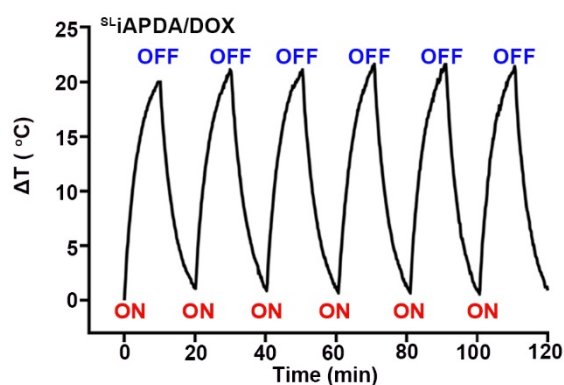

**Fig. S8** Temperature changes of <sup>SLi</sup>iAPDA/DOX under 808 nm NIR irradiation (2 W/cm<sup>2</sup>) for six cycles (10 min of irradiation for each cycle).

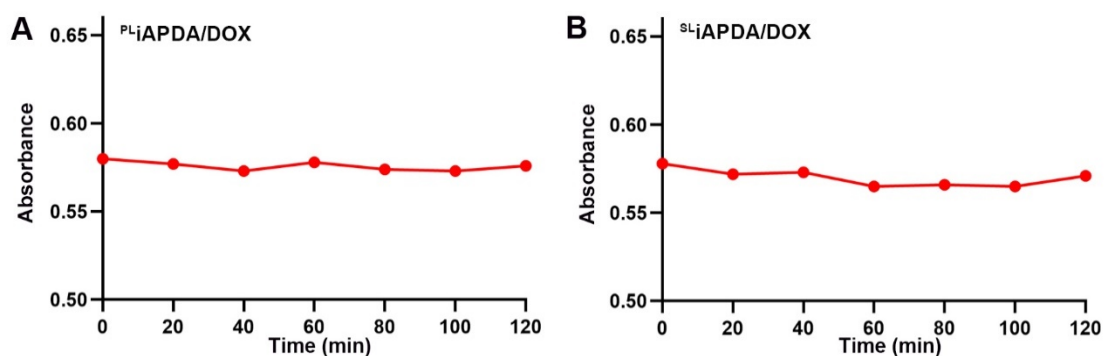

**Fig. S9** Absorbance changes of <sup>PLi</sup>APDA/DOX (A) and <sup>SLi</sup>APDA/DOX (B) under 808 nm NIR irradiation (2 W/cm<sup>2</sup>) for six laser on/off cycles, respectively.

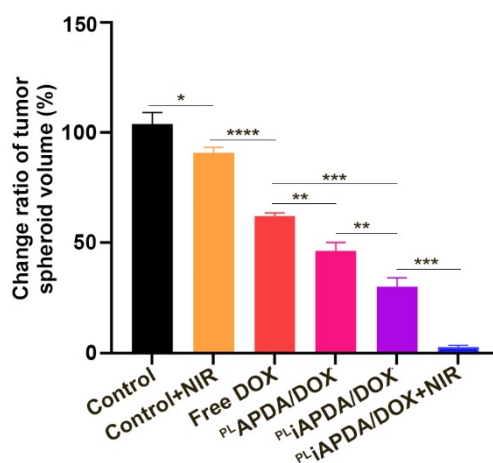

**Fig. S10** Change ratios of 4T1 tumor spheroids volume (%) after applying various formulations and untreated control. Data were presented as mean  $\pm$  SD,  $n = 5$ ; \* $P < 0.05$ , \*\* $P < 0.01$ , \*\*\* $P < 0.001$ , \*\*\*\* $P < 0.0001$ .

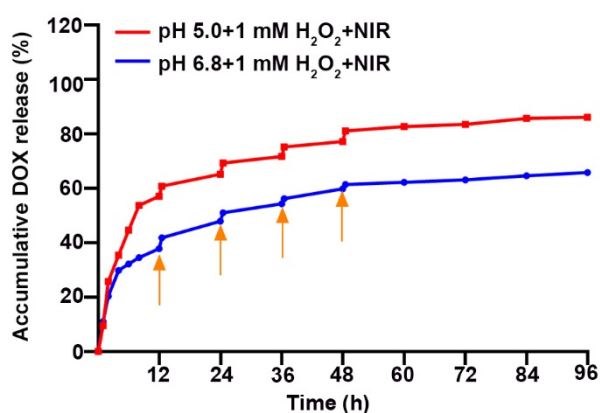

**Fig. S11** Accumulative release of DOX from <sup>PLi</sup>APDA/DOX triggered by NIR irradiation (2 W/cm<sup>2</sup>, 10 min), ROS (1 mM H<sub>2</sub>O<sub>2</sub>), and different pH values (5.0, 6.8) to

simulate the tumor microenvironment, respectively. Data were presented as mean  $\pm$  SD,  $n = 3$ .

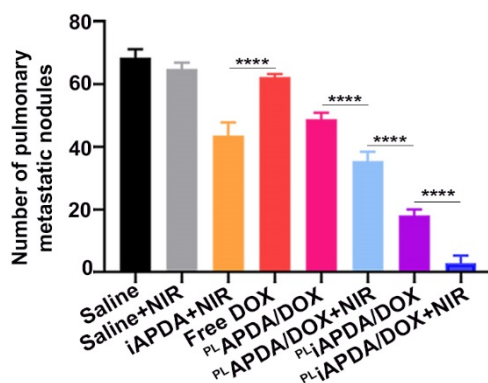

**Fig. S12** Number of pulmonary metastatic nodules of 4T1 tumor-bearing mice after various treatments indicated. Data were presented as mean  $\pm$  SD,  $n = 5$ ; \*\*\*\* $P < 0.0001$ .

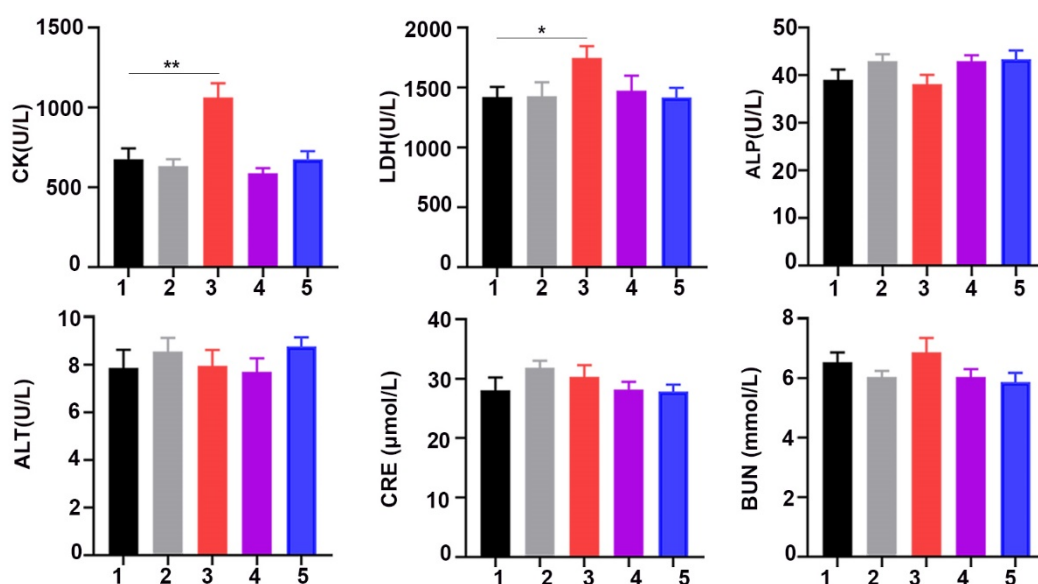

**Fig. S13** Biochemical studies including heart functions (CK, LDH), liver functions (ALP, ALT), and renal functions (CRE, BUN) in healthy mice treated with various treatments (1, saline; 2, saline with irradiation; 3, free DOX; 4, <sup>PLi</sup>APDA/DOX; 5, <sup>PLi</sup>APDA/DOX with irradiation). Dose of DOX: 1.5 mg/kg; irradiation: 808 nm at 2 W/cm<sup>2</sup> for 10 min. Data were presented as mean  $\pm$  SD,  $n = 5$ ; \* $P < 0.05$ . \*\* $P < 0.01$ .

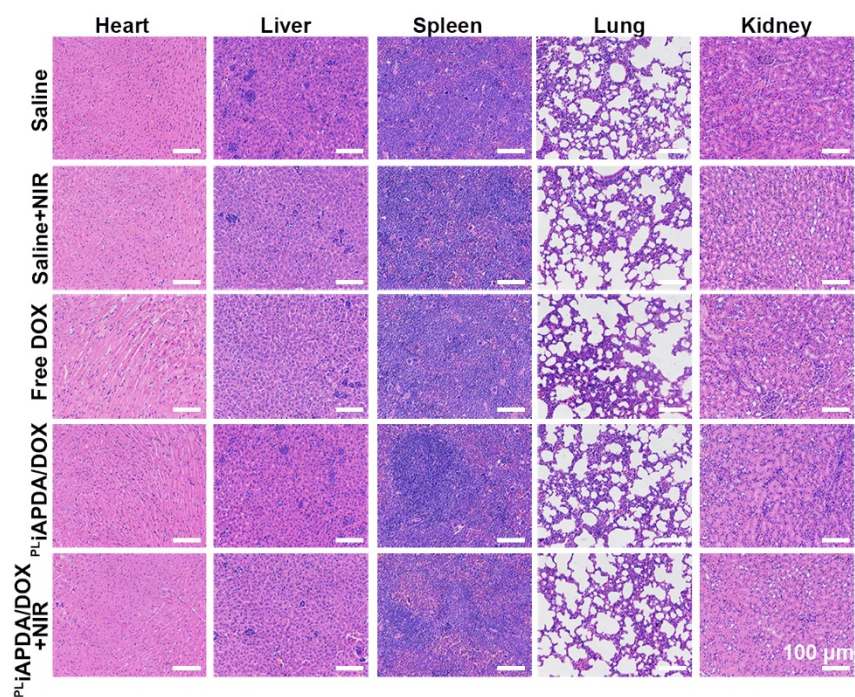

**Fig. S14** H&E histopathological sections of tissues excised from mice in the study groups. Scale bar = 100 μm.

**Table S1** Characterization of different formulations, including PDA, <sup>PL</sup>PDA/DOX, <sup>SL</sup>PDA/DOX, <sup>PLi</sup>APDA/DOX, and <sup>SLi</sup>APDA/DOX. Data were presented as mean ± SD, *n* = 3.

|                             | Diameter<br>(nm) | PDI         | Zeta potential<br>(mV) | EE (%)       | DL (%)       |
|-----------------------------|------------------|-------------|------------------------|--------------|--------------|
| PDA                         | 84.54 ± 0.79     | 0.18 ± 0.03 | -21.05 ± 0.60          | ---          | ---          |
| <sup>PL</sup> PDA/<br>DOX   | 107.70 ± 2.73    | 0.25 ± 0.01 | 16.20 ± 1.08           | 79.71 ± 2.29 | 70.51 ± 0.59 |
| <sup>SL</sup> PDA/<br>DOX   | 105.32 ± 2.14    | 0.15 ± 0.04 | 7.92 ± 1.01            | 24.39 ± 3.13 | 42.23 ± 1.11 |
| <sup>PLi</sup> APDA<br>/DOX | 123.80 ± 1.87    | 0.19 ± 0.04 | -29.31 ± 4.04          | 79.71 ± 2.29 | 57.79 ± 0.48 |
| <sup>SLi</sup> APDA<br>/DOX | 119.10 ± 0.65    | 0.18 ± 0.03 | -35.17 ± 6.02          | 24.39 ± 3.13 | 34.91 ± 0.91 |

**Table S2** Grafting rate of iRGD-apoA-I to PDA nanoparticles in different formulations. Data were presented as mean ± SD, *n* = 3.

| Mass ratio<br>(iA:PDA/DOX) | <sup>PLi</sup> APDA/DOX | <sup>SLi</sup> APDA/DOX |
|----------------------------|-------------------------|-------------------------|
| 0.1:1                      | (8.49 ± 0.27) %         | (8.39 ± 0.30) %         |
| 0.15:1                     | (12.28 ± 0.15) %        | (12.17 ± 0.19) %        |
| 0.25:1                     | (18.03 ± 0.27) %        | (17.33 ± 0.29) %        |
| 0.35:1                     | (18.26 ± 0.31) %        | (17.53 ± 0.72) %        |

**Table S3** IC<sub>50</sub> of iAPDA + NIR, Free DOX, <sup>PL</sup>APDA/DOX, <sup>PL</sup>APDA/DOX, <sup>PL</sup>iAPDA/DOX, and <sup>PL</sup>iAPDA/DOX + NIR.

|                  | iAPDA | Free | <sup>PL</sup> APDA/ | <sup>PL</sup> iAPDA/ | <sup>PL</sup> iAPDA/DOX |
|------------------|-------|------|---------------------|----------------------|-------------------------|
|                  | +NIR  | DOX  | DOX                 | DOX                  | +NIR                    |
| IC <sub>50</sub> | 46.68 | 1.53 | 1.28                | 0.95                 | 0.61                    |
| (μg/mL)          |       |      |                     |                      |                         |
